# Supplementary material for: Diverging Association of Reduced Glomerular Filtration Rate and Albuminuria With Coronary and Noncoronary Events in Patients With Type 2 Diabetes
Source: Oxford University Press journal article supplement (doi:10.2337/dc11-1380), 2011-11-29
Supplement: dc111380supplementarydata.pdf [file dc111380supplementarydata.pdf]

## SUPPLEMENTARY DATA

### **The RIACE Study Group**

#### **The RIACE Steering Committee**

Giuseppe Pugliese (Coordinator), Giuseppe Penno (Secretariat), Anna Solini, Enzo Bonora, Emanuela Orsi, Roberto Trevisan, Luigi Laviola, Antonio Nicolucci.

#### **The Diabetic Nephropathy Study Group, SID**

Giuseppe Pugliese, Salvatore De Cosmo, Gabriella Gruden, Susanna Morano, Giuseppe Penno, Francesco Pugliese, Giampaolo Zerbini, Luigi Laviola, Anna Solini, Roberto Trevisan.

#### **Participating diabetes centers**

1. Azienda Ospedaliera Sant'Andrea, Roma (Coordinating Center): Giuseppe Pugliese, Paola Simonelli, Laura Salvi, Giulia Mazzitelli, Alessandra Bazuro, Aurora Frasheri.
2. Ospedale Le Molinette, Torino: Paolo Cavallo-Perin, Gabriella Gruden, Bartolomeo Lorenzati.
3. Ospedale San Luigi Gonzaga, Orbassano: Mariella Trovati, Giovanni Anfossi, Franco Cavalot, Massimo Chirio.
4. Ospedale San Raffaele, Milan: Giampaolo Zerbini, Valentina Martina.
5. IRCCS "Cà Granda – Ospedale Maggiore Policlinico", Milan: Emanuela Orsi, Laura Montefusco.
6. Ospedale San Paolo, Milan: Antonio Pontiroli, Marco Laneri.
7. Ospedale San Giuseppe, Milan: Maura Arosio, Alessia Dolci.
8. Ospedali Riuniti, Bergamo: Roberto Trevisan, Anna Corsi.
9. Ospedale Maggiore, Verona: Enzo Bonora, Giacomo Zoppini.
10. Policlinico Universitario, Padova: Angelo Avogaro, Monica Vedovato, Elisa Pagnin.
11. Ospedale Cisanello, Azienda Ospedaliero-Universitaria Pisana, Pisa: Giuseppe Penno, Laura Pucci, Daniela Lucchesi, Eugenia Storti.
12. Ospedale Santa Chiara, Azienda Ospedaliero-Universitaria Pisana, Pisa: Anna Solini.
13. Ospedale Le Scotte, Siena: Francesco Dotta, Cecilia Fondelli, Laura Nigi.
14. Policlinico Umberto I, Roma: Susanna Morano, Alessandra Gatti.
15. Ospedale S. Maria Goretti, Latina: Raffaella Buzzetti.
16. Ospedali Riuniti, Foggia: Mauro Cignarelli, Olga Lamacchia, Sabina Pinnelli.
17. Policlinico Universitario, Bari: Francesco Giorgino, Luigi Laviola, Sebastio Perrini.
18. Policlinico Mater Domini, Catanzaro: Giorgio Sesti, Francesco Andreozzi.
19. Policlinico Monserrato, Cagliari: Marco Giorgio Baroni, Giuseppina Frau.

SUPPLEMENTARY DATA

**Supplementary Table 1.** Logistic regression analysis of all CVD events (N=3,654) with individual eGFR and albuminuria categories as covariates.

| <b>Variable</b>                  | <b>OR</b> | <b>95% CI lower limit</b> | <b>95% CI upper limit</b> |
|----------------------------------|-----------|---------------------------|---------------------------|
| Age (1 year)                     | 1.028     | 1.023                     | 1.034                     |
| Male gender                      | 1.838     | 1.676                     | 2.016                     |
| Smoking status                   |           |                           |                           |
| Never                            | 1.0       | -                         | -                         |
| Former                           | 1.546     | 1.409                     | 1.696                     |
| Current                          | 1.154     | 1.021                     | 1.304                     |
| Diabetes duration (1 year)       | 1.046     | 1.040                     | 1.051                     |
| Glucose-lowering treatment       |           |                           |                           |
| Diet                             | 1.0       | -                         | -                         |
| OHA                              | 1.332     | 1.157                     | 1.534                     |
| OHA+insulin                      | 1.583     | 1.316                     | 1.905                     |
| Insulin                          | 2.435     | 2.064                     | 2.874                     |
| Triglycerides (10 mg/dl)         | 0.994     | 0.926                     | 1.000                     |
| HDL cholesterol (5 mg/dl)        | 0.926     | 0.910                     | 0.942                     |
| Dyslipidemia                     | 2.213     | 2.023                     | 2.421                     |
| Hypertension                     | 2.101     | 1.790                     | 2.465                     |
| Retinopathy                      |           |                           |                           |
| Absent                           | 1.0       | -                         | -                         |
| Nonadvanced                      | 1.315     | 1.170                     | 1.478                     |
| Advanced                         | 1.374     | 1.204                     | 1.567                     |
| Albuminuria categories           |           |                           |                           |
| Normal                           | 1.0       | -                         | -                         |
| Low                              | 1.095     | 0.993                     | 1.208                     |
| Micro                            | 1.266     | 1.136                     | 1.411                     |
| Macro                            | 1.259     | 1.045                     | 1.518                     |
| eGFR (MDRD) categories           |           |                           |                           |
| ≥90 mL/min/1.73 m <sup>2</sup>   | 1.0       | -                         | -                         |
| 60-89 mL/min/1.73 m <sup>2</sup> | 1.105     | 0.998                     | 1.224                     |
| 30-59 mL/min/1.73 m <sup>2</sup> | 1.649     | 1.448                     | 1.878                     |
| <30 mL/min/1.73 m <sup>2</sup>   | 1.688     | 1.256                     | 2.269                     |

Variables excluded: HbA<sub>1c</sub>, BMI.

SUPPLEMENTARY DATA

**Supplementary Table 2.** Logistic regression analysis of coronary events with individual eGFR and albuminuria categories as covariates (N=2,405).

| <b>Variable</b>                  | <b>OR</b> | <b>95% CI lower limit</b> | <b>95% CI upper limit</b> |
|----------------------------------|-----------|---------------------------|---------------------------|
| Age (1 year)                     | 1.023     | 1.017                     | 1.028                     |
| Male gender                      | 2.219     | 1.989                     | 2.476                     |
| Smoking status                   |           |                           |                           |
| Never                            | 1.0       | -                         | -                         |
| Former                           | 1.547     | 1.393                     | 1.719                     |
| Current                          | 1.108     | 0.960                     | 1.279                     |
| Diabetes duration (1 year)       | 1.013     | 1.008                     | 1.018                     |
| HbA <sub>1c</sub>                | 1.034     | 1.001                     | 1.069                     |
| Glucose-lowering treatment       |           |                           |                           |
| Diet                             | 1.0       | -                         | -                         |
| OHA                              | 1.243     | 1.056                     | 1.465                     |
| OHA+insulin                      | 1.569     | 1.265                     | 1.945                     |
| Insulin                          | 2.052     | 1.691                     | 2.491                     |
| Triglycerides (10 mg/dl)         | 0.992     | 0.985                     | 0.998                     |
| HDL cholesterol (5 mg/dl)        | 0.926     | 0.907                     | 0.944                     |
| Dyslipidemia                     | 2.852     | 2.553                     | 3.185                     |
| Hypertension                     | 3.104     | 2.554                     | 3.773                     |
| Retinopathy                      |           |                           |                           |
| Absent                           | 1.0       | -                         | -                         |
| Nonadvanced                      | 1.180     | 1.031                     | 1.350                     |
| Advanced                         | 1.177     | 1.011                     | 1.370                     |
| Albuminuria categories           |           |                           |                           |
| Normal                           | 1.0       | -                         | -                         |
| Low                              | 1.041     | 0.930                     | 1.166                     |
| Micro                            | 1.016     | 0.896                     | 1.151                     |
| Macro                            | 0.760     | 0.611                     | 0.946                     |
| eGFR (MDRD) categories           |           |                           |                           |
| ≥90 mL/min/1.73 m <sup>2</sup>   | 1.0       | -                         | -                         |
| 60-89 mL/min/1.73 m <sup>2</sup> | 1.119     | 0.992                     | 1.261                     |
| 30-59 mL/min/1.73 m <sup>2</sup> | 1.743     | 1.501                     | 2.024                     |
| <30 mL/min/1.73 m <sup>2</sup>   | 1.572     | 1.127                     | 2.195                     |

Variables excluded: BMI.

SUPPLEMENTARY DATA

**Supplementary Table 3.** Logistic regression analysis of cerebrovascular events with individual eGFR and albuminuria categories as covariates (N=1,298).

| <b>Variable</b>            | <b>OR</b> | <b>95% CI lower limit</b> | <b>95% CI upper limit</b> |
|----------------------------|-----------|---------------------------|---------------------------|
| Age (1 year)               | 1.032     | 1.024                     | 1.039                     |
| Glucose-lowering treatment |           |                           |                           |
| Diet                       | 1.0       | -                         | -                         |
| OHA                        | 1.193     | 0.952                     | 1.494                     |
| OHA+insulin                | 0.840     | 0.621                     | 1.136                     |
| Insulin                    | 1.496     | 1.161                     | 1.929                     |
| Diabetes duration (1 year) | 1.056     | 1.048                     | 1.064                     |
| HDL cholesterol (5 mg/dl)  | 0.951     | 0.929                     | 0.973                     |
| Dyslipidemia               | 1.520     | 1.325                     | 1.744                     |
| Hypertension               | 1.416     | 1.134                     | 1.770                     |
| Retinopathy                |           |                           |                           |
| Absent                     | 1.0       | -                         | -                         |
| Nonadvanced                | 1.372     | 1.166                     | 1.614                     |
| Advanced                   | 0.877     | 0.717                     | 1.073                     |
| Albuminuria categories     |           |                           |                           |
| Normal                     | 1.0       | -                         | -                         |
| Low                        | 0.976     | 0.836                     | 1.139                     |
| Micro                      | 1.404     | 1.199                     | 1.644                     |
| Macro                      | 1.654     | 1.293                     | 2.115                     |
| Coronary events            | 2.601     | 2.276                     | 2.972                     |
| Peripheral events          | 3.792     | 3.204                     | 4.487                     |

Variables excluded: gender, smoking status, HbA<sub>1c</sub>, triglycerides, BMI, eGFR categories.

SUPPLEMENTARY DATA

**Supplementary Table 4.** Logistic regression analysis of peripheral events with individual eGFR and albuminuria categories as covariates (N=894).

| Variable                         | OR    | 95% CI lower limit | 95% CI upper limit |
|----------------------------------|-------|--------------------|--------------------|
| Age (1 year)                     | 1.012 | 1.003              | 1.021              |
| Male gender                      | 1.211 | 1.024              | 1.433              |
| Smoking status                   |       |                    |                    |
| Never                            | 1.0   | -                  | -                  |
| Former                           | 1.320 | 1.116              | 1.561              |
| Current                          | 1.383 | 1.116              | 1.714              |
| Diabetes duration (1 year)       | 1.037 | 1.027              | 1.047              |
| Glucose-lowering treatment       |       |                    |                    |
| Diet                             | 1.0   | -                  | -                  |
| OHA                              | 1.374 | 1.004              | 1.880              |
| OHA+insulin                      | 1.498 | 1.034              | 2.172              |
| Insulin                          | 2.099 | 1.501              | 2.935              |
| HDL cholesterol (5 mg/dl)        | 0.932 | 0.905              | 0.960              |
| Retinopathy                      |       |                    |                    |
| Absent                           | 1.0   | -                  | -                  |
| Nonadvanced                      | 1.689 | 1.394              | 2.045              |
| Advanced                         | 2.494 | 2.046              | 3.041              |
| Albuminuria categories           |       |                    |                    |
| Normal                           | 1.0   | -                  | -                  |
| Low                              | 1.148 | 0.946              | 1.394              |
| Micro                            | 1.500 | 1.232              | 1.825              |
| Macro                            | 1.982 | 1.491              | 2.635              |
| eGFR (MDRD) categories           |       |                    |                    |
| ≥90 mL/min/1.73 m <sup>2</sup>   | 1.0   | -                  | -                  |
| 60-89 mL/min/1.73 m <sup>2</sup> | 1.141 | 0.935              | 1.394              |
| 30-59 mL/min/1.73 m <sup>2</sup> | 1.469 | 1.163              | 1.856              |
| <30 mL/min/1.73 m <sup>2</sup>   | 1.016 | 0.644              | 1.603              |
| Coronary events                  | 2.771 | 2.371              | 3.238              |
| Cerebrovascular events           | 3.801 | 3.207              | 4.505              |

Variables excluded: HbA<sub>1c</sub>, triglycerides, dyslipidemia, hypertension, BMI.
